# Supplementary material for: Heralded generation of entangled photon pairs
Source: Springer Nature journal article supplement (doi:10.1038/nphoton.2010.156), 2010-06-27
Supplement: 41566_2010_BFnphoton2010156_MOESM7_ESM.pdf [file 41566_2010_BFnphoton2010156_MOESM7_ESM.pdf]

## Supplementary Information - Heralded generation of entangled photon pairs

Stefanie Barz<sup>1,2,†</sup>, Gunther Cronenberg<sup>1,2†</sup>, Anton Zeilinger<sup>1,2</sup>, Philip Walther<sup>1,2</sup>  
<sup>1</sup> Faculty of Physics, University of Vienna, Boltzmannngasse 5, A-1090 Vienna, Austria  
<sup>2</sup> Institute for Quantum Optics and Quantum Information (IQOQI),  
Austrian Academy of Sciences, Boltzmannngasse 3, A-1090 Vienna, Austria  
<sup>†</sup> These authors contributed equally to this work

The analysis of the polarization-dependent photon-number distribution using the Fock basis is shown in Table I. This data represents the diagonal elements of the density matrix, i.e. the probabilities of having  $n$  photons in each mode, starting from the vacuum contribution up to the case with one photon in each mode.

|               | 17/83                            | 30/70                            | 50/50                            | 70/30                            |
|---------------|----------------------------------|----------------------------------|----------------------------------|----------------------------------|
| $P_{0,0;0,0}$ | $(9.74 \pm 0.002) \cdot 10^{-1}$ | $(9.63 \pm 0.003) \cdot 10^{-1}$ | $(9.14 \pm 0.006) \cdot 10^{-1}$ | $(8.68 \pm 0.023) \cdot 10^{-1}$ |
| $P_{1,0;0,0}$ | $(7.19 \pm 0.08) \cdot 10^{-3}$  | $(10.8 \pm 0.15) \cdot 10^{-3}$  | $(2.42 \pm 0.04) \cdot 10^{-2}$  | $(2.70 \pm 0.12) \cdot 10^{-2}$  |
| $P_{0,1;0,0}$ | $(8.32 \pm 0.09) \cdot 10^{-3}$  | $(10.2 \pm 0.14) \cdot 10^{-3}$  | $(2.26 \pm 0.03) \cdot 10^{-2}$  | $(3.25 \pm 0.13) \cdot 10^{-2}$  |
| $P_{0,0;1,0}$ | $(5.77 \pm 0.07) \cdot 10^{-3}$  | $(8.41 \pm 0.13) \cdot 10^{-3}$  | $(1.58 \pm 0.03) \cdot 10^{-2}$  | $(2.72 \pm 0.12) \cdot 10^{-2}$  |
| $P_{0,0;0,1}$ | $(4.47 \pm 0.65) \cdot 10^{-3}$  | $(7.20 \pm 0.12) \cdot 10^{-3}$  | $(1.93 \pm 0.03) \cdot 10^{-2}$  | $(3.62 \pm 0.14) \cdot 10^{-2}$  |
| $P_{1,1;0,0}$ | $(2.08 \pm 0.44) \cdot 10^{-5}$  | $(2.38 \pm 0.69) \cdot 10^{-5}$  | $(2.41 \pm 0.35) \cdot 10^{-4}$  | $(3.75 \pm 1.42) \cdot 10^{-4}$  |
| $P_{1,0;1,0}$ | $(12.05 \pm 0.85) \cdot 10^{-5}$ | $(32.3 \pm 2.02) \cdot 10^{-5}$  | $(10.26 \pm 0.68) \cdot 10^{-4}$ | $(2.22 \pm 0.32) \cdot 10^{-3}$  |
| $P_{1,0;0,1}$ | $(2.56 \pm 0.73) \cdot 10^{-5}$  | $(0.718 \pm 1.63) \cdot 10^{-5}$ | $(5.94 \pm 0.64) \cdot 10^{-4}$  | $(1.01 \pm 0.33) \cdot 10^{-3}$  |
| $P_{0,1;1,0}$ | $(4.88 \pm 0.87) \cdot 10^{-5}$  | $(6.84 \pm 1.76) \cdot 10^{-5}$  | $(5.22 \pm 0.56) \cdot 10^{-4}$  | $(1.83 \pm 0.32) \cdot 10^{-3}$  |
| $P_{0,1;0,1}$ | $(6.28 \pm 0.66) \cdot 10^{-5}$  | $(21.5 \pm 1.52) \cdot 10^{-5}$  | $(9.20 \pm 0.65) \cdot 10^{-4}$  | $(2.96 \pm 0.34) \cdot 10^{-3}$  |
| $P_{0,0;1,1}$ | $(6.63 \pm 0.25) \cdot 10^{-6}$  | $(1.19 \pm 0.49) \cdot 10^{-5}$  | $(1.31 \pm 0.26) \cdot 10^{-4}$  | $(3.75 \pm 1.42) \cdot 10^{-4}$  |
| $P_{1,1;1,0}$ | 0                                | $(1.98 \pm 1.98) \cdot 10^{-6}$  | $(2.6 \pm 1.17) \cdot 10^{-5}$   | 0                                |
| $P_{1,1;0,1}$ | 0                                | $(3.96 \pm 2.80) \cdot 10^{-6}$  | 0                                | $(1.07 \pm 0.76) \cdot 10^{-4}$  |
| $P_{1,0;1,1}$ | 0                                | 0                                | $(1.05 \pm 0.74) \cdot 10^{-5}$  | 0                                |
| $P_{0,1;1,1}$ | 0                                | 0                                | 0                                | 0                                |
| $P_{1,1;1,1}$ | 0                                | 0                                | 0                                | 0                                |

TABLE I: The Table lists the measured probabilities  $P_{n_{1H}, n_{1V}; n_{2H}, n_{2V}}$  of finding  $n_{1H}$ ,  $n_{1V}$ ,  $n_{2H}$  and  $n_{2V}$  photons numbers in the output modes  $t_{1H}, t_{1V}, t_{2H}$  and  $t_{2V}$  with orthogonal polarizations H and V for the different beam splitter transmissions using our standard photo-avalanche diodes. The error for each probability is following a Poissonian distribution of the measured counts.

For each beam splitter transmission ratio we used a (overcomplete) tomographic set of measurements for each basis  $\sigma_x, \sigma_y, \sigma_z$  to reconstruct the polarization correlations of the (high-power) output state. In Table II we list the measured detection events that were triggered by a four-fold coincidence of the ancilla photons.

| 17/83    | $\sigma_x^{(1)}\sigma_x^{(2)}$ | $\sigma_y^{(1)}\sigma_y^{(2)}$ | $\sigma_z^{(1)}\sigma_z^{(2)}$ | $\sigma_x^{(1)}\sigma_z^{(2)}$ | $\sigma_x^{(1)}\sigma_y^{(2)}$ | $\sigma_z^{(1)}\sigma_y^{(2)}$ | $\sigma_z^{(1)}\sigma_x^{(2)}$ | $\sigma_y^{(1)}\sigma_x^{(2)}$ | $\sigma_y^{(1)}\sigma_z^{(2)}$ |
|----------|--------------------------------|--------------------------------|--------------------------------|--------------------------------|--------------------------------|--------------------------------|--------------------------------|--------------------------------|--------------------------------|
| 0,0;0,0⟩ | 124009                         | 116831                         | 120881                         | 118334                         | 109941                         | 113054                         | 93318                          | 119896                         | 111629                         |
| 1,0;0,0⟩ | 990                            | 811                            | 776                            | 995                            | 925                            | 716                            | 636                            | 906                            | 831                            |
| 0,1;0,0⟩ | 871                            | 946                            | 1114                           | 909                            | 785                            | 1048                           | 969                            | 1122                           | 1014                           |
| 0,0;1,0⟩ | 665                            | 661                            | 668                            | 733                            | 659                            | 610                            | 587                            | 779                            | 727                            |
| 0,0;0,1⟩ | 545                            | 447                            | 531                            | 568                            | 528                            | 481                            | 436                            | 595                            | 591                            |
| 1,1;0,0⟩ | 1                              | 0                              | 2                              | 5                              | 2                              | 5                              | 2                              | 1                              | 4                              |
| 1,0;1,0⟩ | 11                             | 3                              | 8                              | 7                              | 8                              | 10                             | 14                             | 6                              | 13                             |
| 1,0;0,1⟩ | 3                              | 8                              | 7                              | 10                             | 11                             | 2                              | 5                              | 11                             | 2                              |
| 0,1;1,0⟩ | 9                              | 13                             | 4                              | 15                             | 11                             | 7                              | 5                              | 11                             | 9                              |
| 0,1;0,1⟩ | 5                              | 2                              | 6                              | 6                              | 2                              | 9                              | 5                              | 4                              | 10                             |
| 0,0;1,1⟩ | 1                              | 0                              | 1                              | 1                              | 0                              | 0                              | 2                              | 1                              | 1                              |
| 1,1;1,0⟩ | 0                              | 0                              | 0                              | 0                              | 0                              | 0                              | 0                              | 0                              | 0                              |
| 1,1;0,1⟩ | 0                              | 0                              | 0                              | 0                              | 0                              | 0                              | 0                              | 0                              | 0                              |
| 1,0;1,1⟩ | 0                              | 0                              | 0                              | 0                              | 0                              | 0                              | 0                              | 0                              | 0                              |
| 0,1;1,1⟩ | 0                              | 0                              | 0                              | 0                              | 0                              | 0                              | 0                              | 0                              | 0                              |
| 1,1;1,1⟩ | 0                              | 0                              | 0                              | 0                              | 0                              | 0                              | 0                              | 0                              | 0                              |
| 30/70    | $\sigma_x^{(1)}\sigma_x^{(2)}$ | $\sigma_y^{(1)}\sigma_y^{(2)}$ | $\sigma_z^{(1)}\sigma_z^{(2)}$ | $\sigma_x^{(1)}\sigma_z^{(2)}$ | $\sigma_x^{(1)}\sigma_y^{(2)}$ | $\sigma_z^{(1)}\sigma_y^{(2)}$ | $\sigma_z^{(1)}\sigma_x^{(2)}$ | $\sigma_y^{(1)}\sigma_x^{(2)}$ | $\sigma_y^{(1)}\sigma_z^{(2)}$ |
| 0,0;0,0⟩ | 53770                          | 59081                          | 61607                          | 54745                          | 55060                          | 57606                          | 26923                          | 57227                          | 59855                          |
| 1,0;0,0⟩ | 568                            | 683                            | 677                            | 579                            | 584                            | 644                            | 257                            | 708                            | 752                            |
| 0,1;0,0⟩ | 610                            | 571                            | 674                            | 605                            | 600                            | 587                            | 327                            | 587                            | 605                            |
| 0,0;1,0⟩ | 506                            | 491                            | 551                            | 486                            | 450                            | 457                            | 220                            | 516                            | 570                            |
| 0,0;0,1⟩ | 374                            | 463                            | 399                            | 380                            | 499                            | 442                            | 222                            | 408                            | 449                            |
| 1,1;0,0⟩ | 0                              | 0                              | 1                              | 3                              | 2                              | 1                              | 3                              | 2                              | 0                              |
| 1,0;1,0⟩ | 19                             | 4                              | 17                             | 11                             | 11                             | 7                              | 5                              | 17                             | 13                             |
| 1,0;0,1⟩ | 6                              | 10                             | 3                              | 5                              | 6                              | 14                             | 6                              | 10                             | 8                              |
| 0,1;1,0⟩ | 10                             | 21                             | 4                              | 13                             | 6                              | 9                              | 3                              | 8                              | 5                              |
| 0,1;0,1⟩ | 14                             | 3                              | 8                              | 2                              | 4                              | 8                              | 5                              | 7                              | 8                              |
| 0,0;1,1⟩ | 0                              | 0                              | 1                              | 2                              | 0                              | 0                              | 0                              | 1                              | 2                              |
| 1,1;1,0⟩ | 0                              | 0                              | 1                              | 0                              | 0                              | 0                              | 0                              | 0                              | 0                              |
| 1,1;0,1⟩ | 0                              | 0                              | 0                              | 0                              | 2                              | 0                              | 0                              | 0                              | 0                              |
| 1,0;1,1⟩ | 0                              | 0                              | 0                              | 0                              | 0                              | 0                              | 0                              | 0                              | 0                              |
| 0,1;1,1⟩ | 0                              | 0                              | 0                              | 0                              | 0                              | 0                              | 0                              | 0                              | 0                              |
| 1,1;1,1⟩ | 0                              | 0                              | 0                              | 0                              | 0                              | 0                              | 0                              | 0                              | 0                              |

| 50/50                | $\sigma_x^{(1)}\sigma_x^{(2)}$ | $\sigma_y^{(1)}\sigma_y^{(2)}$ | $\sigma_z^{(1)}\sigma_z^{(2)}$ | $\sigma_x^{(1)}\sigma_z^{(2)}$ | $\sigma_x^{(1)}\sigma_y^{(2)}$ | $\sigma_z^{(1)}\sigma_y^{(2)}$ | $\sigma_z^{(1)}\sigma_x^{(2)}$ | $\sigma_y^{(1)}\sigma_x^{(2)}$ | $\sigma_y^{(1)}\sigma_z^{(2)}$ |
|----------------------|--------------------------------|--------------------------------|--------------------------------|--------------------------------|--------------------------------|--------------------------------|--------------------------------|--------------------------------|--------------------------------|
| $ 0, 0; 0, 0\rangle$ | 32429                          | 15769                          | 16779                          | 14303                          | 14002                          | 16309                          | 31535                          | 17756                          | 15859                          |
| $ 1, 0; 0, 0\rangle$ | 956                            | 443                            | 390                            | 377                            | 387                            | 376                            | 838                            | 446                            | 405                            |
| $ 0, 1; 0, 0\rangle$ | 749                            | 394                            | 482                            | 304                            | 292                            | 443                            | 884                            | 398                            | 374                            |
| $ 0, 0; 1, 0\rangle$ | 576                            | 277                            | 208                            | 204                            | 253                            | 314                            | 623                            | 338                            | 224                            |
| $ 0, 0; 0, 1\rangle$ | 627                            | 319                            | 433                            | 302                            | 292                            | 308                            | 720                            | 312                            | 381                            |
| $ 1, 1; 0, 0\rangle$ | 6                              | 1                              | 9                              | 5                              | 4                              | 5                              | 15                             | 1                              | 0                              |
| $ 1, 0; 1, 0\rangle$ | 47                             | 3                              | 15                             | 13                             | 13                             | 16                             | 29                             | 20                             | 14                             |
| $ 1, 0; 0, 1\rangle$ | 25                             | 38                             | 9                              | 5                              | 14                             | 15                             | 22                             | 12                             | 8                              |
| $ 0, 1; 1, 0\rangle$ | 19                             | 18                             | 8                              | 14                             | 4                              | 8                              | 21                             | 14                             | 7                              |
| $ 0, 1; 0, 1\rangle$ | 33                             | 2                              | 11                             | 17                             | 9                              | 11                             | 48                             | 12                             | 11                             |
| $ 0, 0; 1, 1\rangle$ | 4                              | 1                              | 4                              | 3                              | 0                              | 0                              | 10                             | 2                              | 1                              |
| $ 1, 1; 1, 0\rangle$ | 2                              | 0                              | 0                              | 1                              | 0                              | 0                              | 2                              | 0                              | 0                              |
| $ 1, 1; 0, 1\rangle$ | 0                              | 0                              | 0                              | 0                              | 0                              | 0                              | 0                              | 0                              | 0                              |
| $ 1, 0; 1, 1\rangle$ | 1                              | 0                              | 0                              | 0                              | 0                              | 0                              | 1                              | 0                              | 0                              |
| $ 0, 1; 1, 1\rangle$ | 0                              | 0                              | 0                              | 0                              | 0                              | 0                              | 0                              | 0                              | 0                              |
| $ 1, 1; 1, 1\rangle$ | 0                              | 0                              | 0                              | 0                              | 0                              | 0                              | 0                              | 0                              | 0                              |
| 70/30                | $\sigma_x^{(1)}\sigma_x^{(2)}$ | $\sigma_y^{(1)}\sigma_y^{(2)}$ | $\sigma_z^{(1)}\sigma_z^{(2)}$ | $\sigma_x^{(1)}\sigma_z^{(2)}$ | $\sigma_x^{(1)}\sigma_y^{(2)}$ | $\sigma_z^{(1)}\sigma_y^{(2)}$ | $\sigma_z^{(1)}\sigma_x^{(2)}$ | $\sigma_y^{(1)}\sigma_x^{(2)}$ | $\sigma_y^{(1)}\sigma_z^{(2)}$ |
| $ 0, 0; 0, 0\rangle$ | 833                            | 1371                           | 1480                           | 1478                           | 1402                           | 3360                           | 3630                           | 1692                           | 972                            |
| $ 1, 0; 0, 0\rangle$ | 23                             | 55                             | 36                             | 56                             | 52                             | 94                             | 102                            | 64                             | 22                             |
| $ 0, 1; 0, 0\rangle$ | 27                             | 43                             | 79                             | 55                             | 38                             | 136                            | 140                            | 57                             | 33                             |
| $ 0, 0; 1, 0\rangle$ | 26                             | 42                             | 48                             | 31                             | 45                             | 110                            | 121                            | 61                             | 25                             |
| $ 0, 0; 0, 1\rangle$ | 34                             | 47                             | 66                             | 52                             | 44                             | 147                            | 170                            | 76                             | 41                             |
| $ 1, 1; 0, 0\rangle$ | 0                              | 1                              | 1                              | 1                              | 2                              | 2                              | 0                              | 0                              | 0                              |
| $ 1, 0; 1, 0\rangle$ | 4                              | 1                              | 3                              | 3                              | 4                              | 6                              | 6                              | 4                              | 4                              |
| $ 1, 0; 0, 1\rangle$ | 2                              | 5                              | 4                              | 8                              | 4                              | 10                             | 3                              | 3                              | 0                              |
| $ 0, 1; 1, 0\rangle$ | 2                              | 4                              | 2                              | 1                              | 2                              | 11                             | 7                              | 3                              | 4                              |
| $ 0, 1; 0, 1\rangle$ | 4                              | 0                              | 7                              | 1                              | 4                              | 12                             | 6                              | 4                              | 2                              |
| $ 0, 0; 1, 1\rangle$ | 1                              | 0                              | 0                              | 2                              | 2                              | 0                              | 0                              | 2                              | 0                              |
| $ 1, 1; 1, 0\rangle$ | 0                              | 0                              | 0                              | 0                              | 0                              | 0                              | 0                              | 0                              | 0                              |
| $ 1, 1; 0, 1\rangle$ | 0                              | 0                              | 0                              | 0                              | 1                              | 0                              | 1                              | 0                              | 0                              |
| $ 1, 0; 1, 1\rangle$ | 0                              | 0                              | 0                              | 0                              | 0                              | 0                              | 0                              | 0                              | 0                              |
| $ 0, 1; 1, 1\rangle$ | 0                              | 0                              | 0                              | 0                              | 0                              | 0                              | 0                              | 0                              | 0                              |
| $ 1, 1; 1, 1\rangle$ | 0                              | 0                              | 0                              | 0                              | 0                              | 0                              | 0                              | 0                              | 0                              |

TABLE II: We show the measured photon-numbers for each polarization and spatial mode,  $|n_{1H}, n_{1V}, n_{2H}, n_{2V}\rangle$ , where  $n_{1H}$ ,  $n_{1V}$  denote the photon number for the orthogonal polarization states in output mode 1 and  $n_{2H}$ ,  $n_{2V}$  denote the orthogonal polarization states in output mode 2. The settings for the different measurement bases  $\sigma_i^{(1)}\sigma_j^{(2)}$  with  $i, j = x, y, z$  are adjusted by phase retarders in front of the polarizing beam splitters.
